# Supplementary material for: Interpretation of mass spectra by a Vocus proton-transfer-reaction mass spectrometer (PTR-MS) at an urban site: insights from gas chromatographic pre-separation
Source: Copernicus journal article supplement (doi:10.5194/amt-18-3547-2025), 2025-07-30
Supplement: Supplementary file 1 [file amt-18-3547-2025-supplement.pdf]

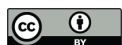

*Supplement of*

## **Interpretation of mass spectra by a Vocus proton-transfer-reaction mass spectrometer (PTR-MS) at an urban site: insights from gas chromatographic pre-separation**

**Ying Zhang et al.**

*Correspondence to:* Lin Wang (lin\_wang@fudan.edu.cn)

The copyright of individual parts of the supplement might differ from the article licence.

## **Additional description of GC set ups and procedures.**

When the GC system collects a sample, the sample first passes through an oxidant trap that contains activated sodium sulfite to minimize the impact of artifact-generating oxidants, like ozone, on the preconcentration steps. After the oxidant trap, the sample is split to two separate channels for preconcentration, where only Ch1 is equipped with a water trap to remove excess water to avoid condensation in the preconcentration steps. For both Ch1 and Ch2, the sample is initially preconcentrated onto multi-bed sample traps (Markes International, Universal 1000, C3-BAXX-5070 glass tube). Following the collection onto the sample traps, the system goes through a post-collection water purge for 2 min by forward-flowing dry gas (ultra-high purity N<sub>2</sub>) through the traps. The collected sample is then thermally desorbed from the sample traps to transfer the sample to the second stage of the preconcentration system, multi-bed focusing traps (Markes International, U-T15ATA-2S cold trap). After this second preconcentration event, each focus trap is flash heated to transfer the sample to the head of that channel's designated column.

The temperature profiles of the sample traps and the focus traps in the GC system in one typical cycle are also shown in Fig. 1. Taking Ch1 for instance, the sample traps were flushed with a high-purity helium gas at 20 cm<sup>3</sup> min<sup>-1</sup> (sccm) and at the same time heated, i.e., at 570 s for EI-MS detection and at 2370 s for PTR-MS detection, respectively in the cycle, to fully desorb the captured VOCs. The sample trap heating initially ramped from 30 °C to 150 °C at a rate of 12 °C/sec, and then from 150 °C to 300 °C at a rate of 2.5 °C/sec. The sample traps were then held at 300 °C for 60 seconds and then cooled to 30 °C within 300 seconds. The desorbed organic molecules were transported using the same 20 sccm helium as a carrier gas to the focus traps where they were further pre-concentrated. The focus traps were flash heated to achieve a discrete thermal desorption of captured VOCs. Taking Ch1 for example, the heating processes started at 1075 s for EI-MS detection and at 2875 s for PTR-MS detection, respectively in the cycle. The focus traps were heated from 30 °C to 300 °C within 10 second, and then held at 300 °C for 30 second and then cooled to 30 °C to concentrate collected organics onto the head of the GC columns. At the beginning of every half hour (0–300 s and 1800–2100 s in the one-hour cycle), the focus traps underwent a second heating process as described above as a precautionary cleaning procedure to remove VOCs that might remain in the previous trapping process (e.g. low-volatility species outside of the analytical range).

The temperature profiles of the two columns are also shown in Fig. 1. The two chromatographic columns, housed in separate ovens, underwent a similar temperature program after the focus traps cooled down to 30 °C. The temperature program consisted of four phases: initially from 35 °C to 100 °C at a rate of 39 °C/min, then from 100 °C to 150 °C at a rate of 15 °C/min and from 150 °C to 220 °C at a rate of 30 °C/min, and lastly held at 220 °C for 60 seconds for Ch1 and for 150 seconds for Ch2, respectively. The columns were cooled down in 150 seconds and kept at 35 °C until the next heating process.

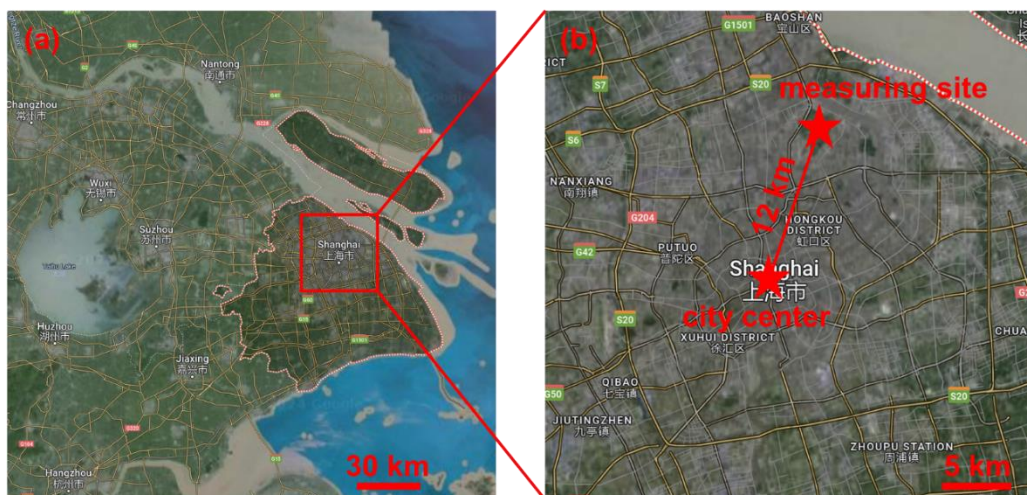

**Figure S1** The location of the measurement site as shown in a Google map (© Google Maps 2025).

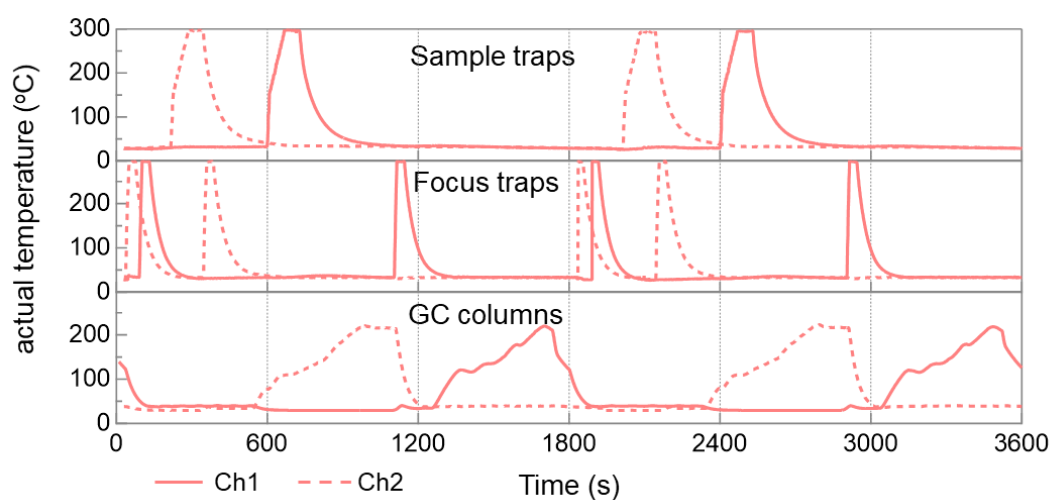

**Figure S2** Temperature profiles for the two-channel GC system (sample traps, focus traps, and GC columns).

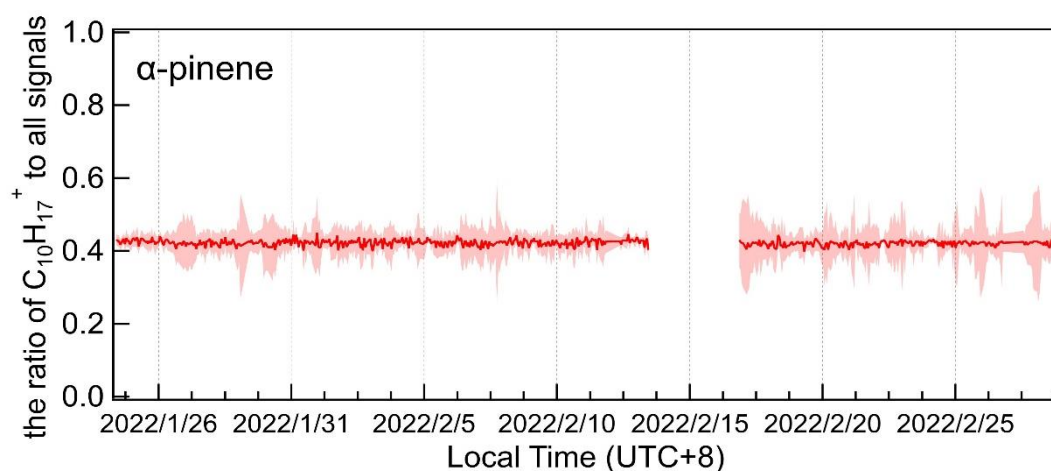

**Figure S3** The ratio of  $C_{10}H_{17}^+$  signal to all signals for  $\alpha$ -pinene during the measurement, suggesting an estimated E/N of  $\sim 130$  Td.

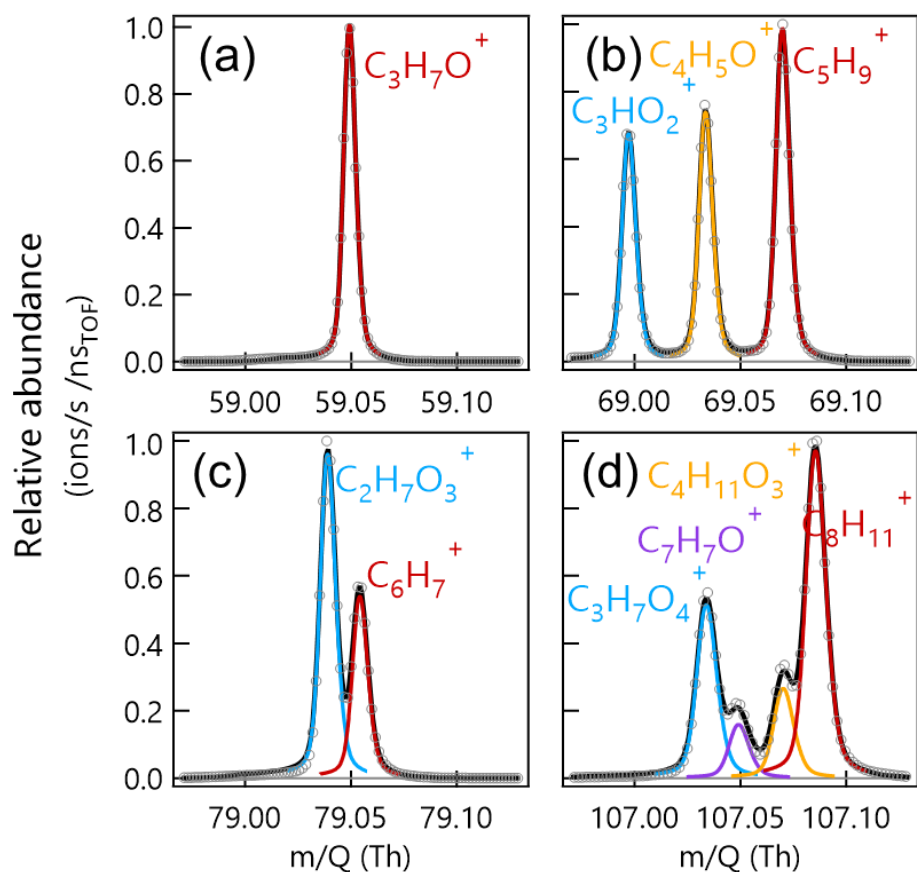

44 **Figure S4** High-resolution fitting of PTR signals at (A) ~59 Th, (B) ~69 Th, (C) ~79 Th, and (D) ~107 Th,  
 45 respectively.

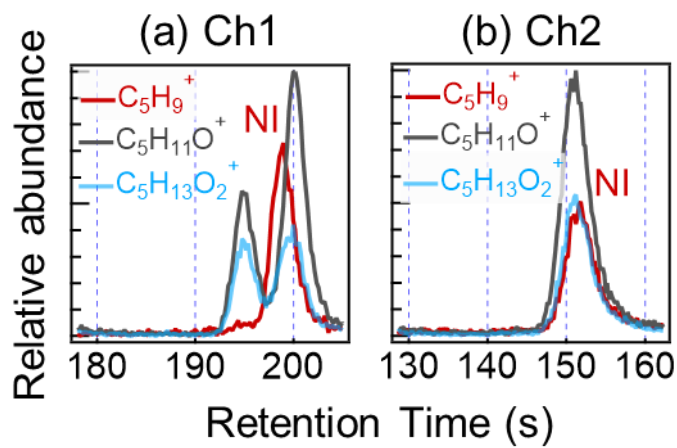

47 **Figure S5** The GC-PTR chromatograms for d-NI that produces  $C_5H_9^+$  signals in the PTR measurement.

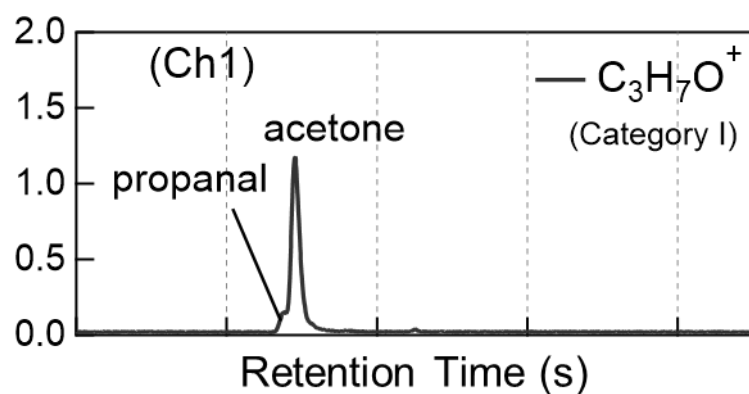

48 **Figure S6** A GC-PTR chromatogram of  $\text{C}_3\text{H}_7\text{O}^+$ , sampled from 7:26:46 to 7:35:07 on 19 February 2022.  
 49

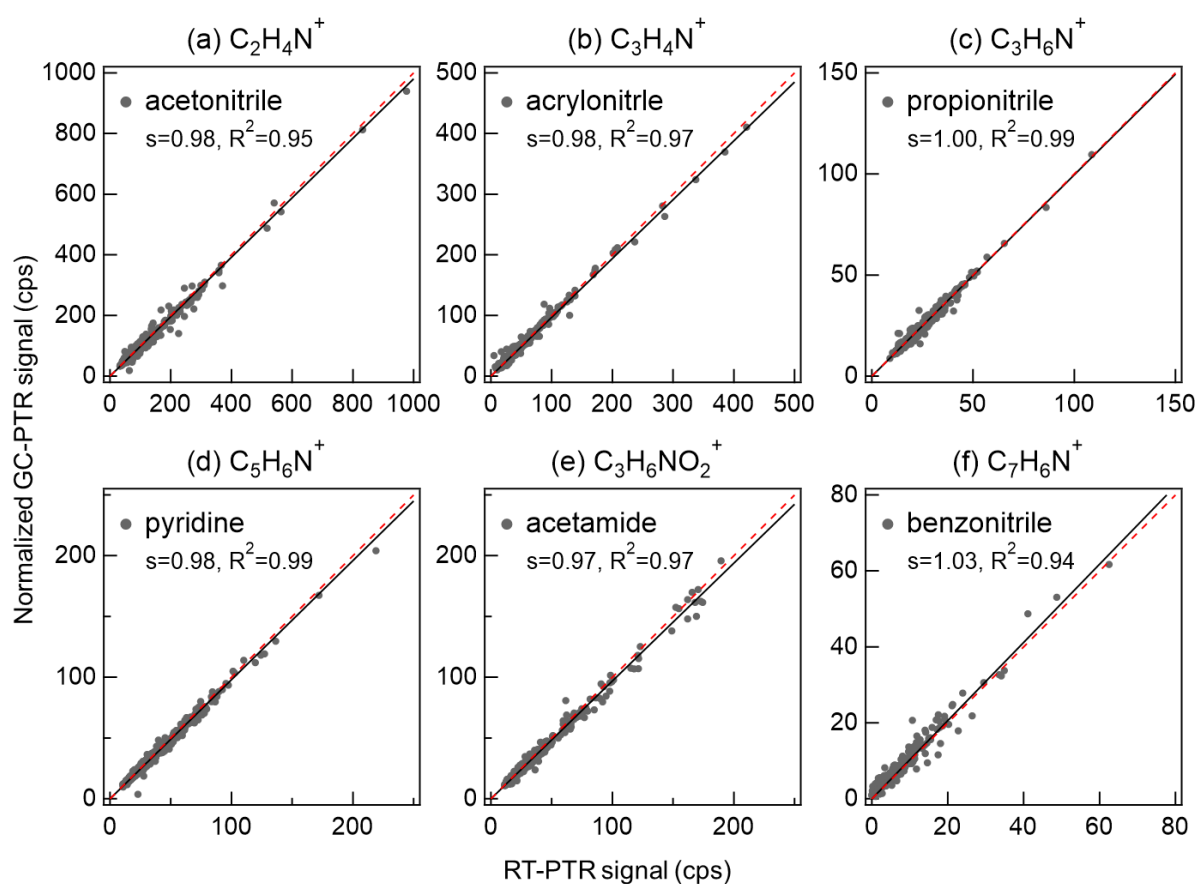

50 **Figure S7** Inter-comparison of PTR signals between RT-PTR and GC-PTR for N-containing species with  
 51 a time resolution of one hour. The GC-PTR signals are the average values of Ch1 and Ch2.  $s$  denotes the  
 52 slope of the linear fitting and  $R^2$  denotes R square. The red dashed line is a 1:1 line for reference.  
 53

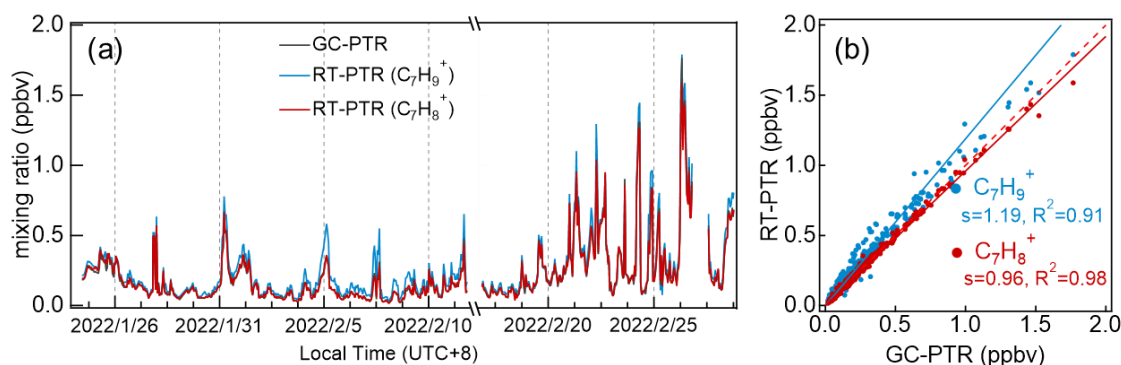

**Figure S8** Inter-comparison of mixing ratios of toluene between GC-PTR measurements and RT-PTR measurements quantified by  $C_7H_9^+$  and  $C_7H_8^+$ . The red dashed line denotes a 1:1 line for reference. The slope and R square are noted as  $s$  and  $R^2$ , respectively.

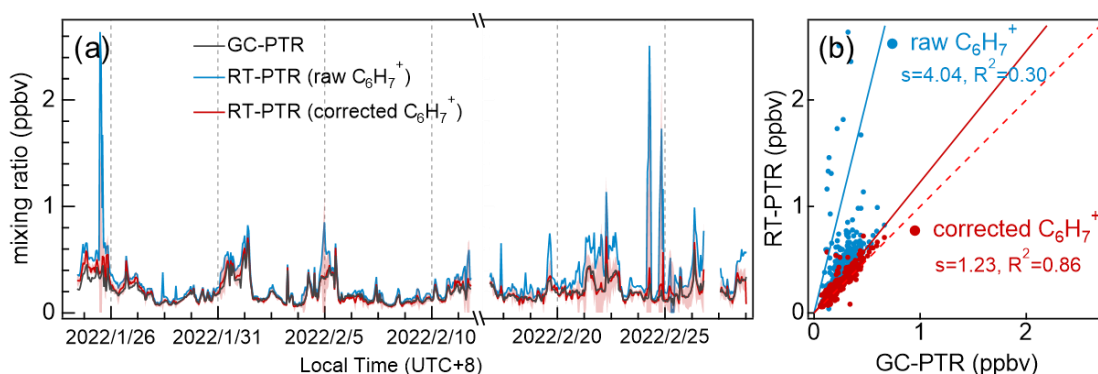

**Figure S9** Inter-comparison of mixing ratios of benzene between GC-PTR measurements and RT-PTR measurements quantified by raw and corrected  $C_6H_7^+$  signals. The red dashed line denotes a 1:1 line for reference. The slope and R square are noted as  $s$  and  $R^2$ , respectively.

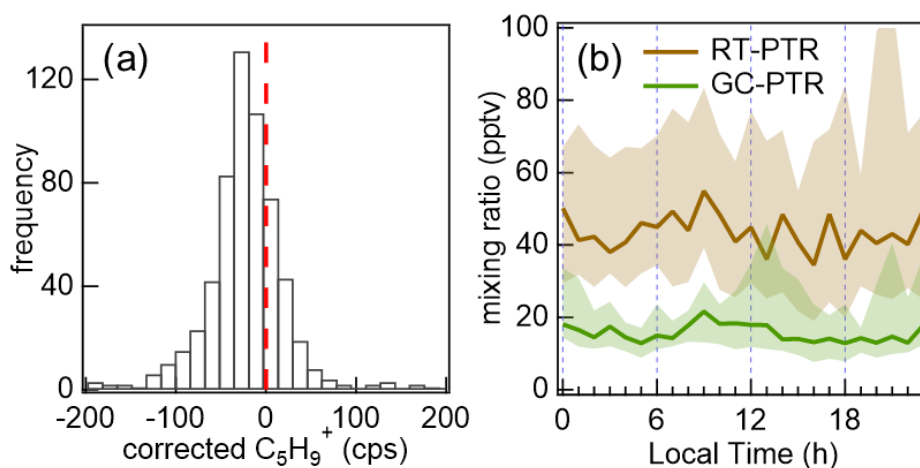

**Figure S10** (A) Corrected  $C_5H_9^+$  signals by RT-PTR for isoprene following the method developed by Matthew Coggon et. al. (2024). (B) Diurnal patterns of isoprene derived from RT-PTR and GC-PTR measurements, respectively. The solid lines denote the median values, and the shaded edges represent the upper and lower quartiles.

66 **Table S1** Attribution of PTR signals to atmospheric species confirmed with the combination of GC and  
67 PTR-MS in previous studies.

| m/z <sup>a</sup> | Signal ion                                     | Main VOC identity | Interferences <sup>b,c,d</sup> |                               |                                |                                          |                                                 |
|------------------|------------------------------------------------|-------------------|--------------------------------|-------------------------------|--------------------------------|------------------------------------------|-------------------------------------------------|
|                  |                                                |                   | Utrecht (Gouw et al., 2003)    | Sonnblick (Gouw et al., 2003) | Boulder (Warneke et al., 2003) | Wisconsin (Vermeuel et al., 2023)        | Las Vegas (Coggon et al., 2024)                 |
| 33               | CH <sub>4</sub> OH <sup>+</sup>                | methanol          | NI                             | NI                            | NI                             | NR                                       | NI                                              |
| 42               | CH <sub>3</sub> CNH <sup>+</sup>               | acetonitrile      | NI                             | NI                            | NI                             | NR                                       | NR                                              |
| 45               | C <sub>2</sub> H <sub>4</sub> OH <sup>+</sup>  | acetaldehyde      | NI                             | UI                            | UI                             | NR                                       | ethanol                                         |
| 59               | C <sub>3</sub> H <sub>6</sub> OH <sup>+</sup>  | acetone           | propanal                       | NR                            | propanal                       | NR                                       | propanal                                        |
| 63               | C <sub>2</sub> H <sub>6</sub> SH <sup>+</sup>  | dimethyl sulfide  | NR                             | NR                            | NR                             | NI                                       | NR                                              |
| 69               | C <sub>5</sub> H <sub>8</sub> H <sup>+</sup>   | isoprene          | methylbutanals, pentenols      | methylbutanals, pentenols     | NR                             | heptanal, 1-nonene, octanal, and nonanal | methylbutanals, pentanal, octanal, and nonanal. |
| 71               | C <sub>4</sub> H <sub>6</sub> OH <sup>+</sup>  | C4 carbonyls      | NR                             | NR                            | NR                             | NR                                       | NI                                              |
| 79               | C <sub>6</sub> H <sub>6</sub> H <sup>+</sup>   | benzene           | NI                             | ethylbenzene                  | NI                             | NR                                       | ethylbenzene                                    |
| 93               | C <sub>7</sub> H <sub>8</sub> H <sup>+</sup>   | toluene           | NI                             | NI                            | NI                             | NR                                       | benzaldehyde                                    |
| 105              | C <sub>8</sub> H <sub>8</sub> H <sup>+</sup>   | styrene           | NI                             | NR                            | NI                             | NR                                       | ethyl-methyl-benzenes                           |
| 107              | C <sub>8</sub> H <sub>10</sub> H <sup>+</sup>  | C8-aromatics      | NI                             | NI                            | NI                             | NR                                       | NR                                              |
|                  | C <sub>7</sub> H <sub>7</sub> O <sup>+</sup>   | benzaldehyde      | NI                             | NI                            | NI                             | NR                                       | NI                                              |
| 121              | C <sub>9</sub> H <sub>12</sub> H <sup>+</sup>  | C9-aromatics      | NI                             | NI                            | NI                             | NR                                       | NI                                              |
| 137              | C <sub>10</sub> H <sub>16</sub> H <sup>+</sup> | monoterpenes      | NR                             | NR                            | NR                             | NI                                       | NR                                              |

68 Notes:  
69 <sup>a</sup> PTR-MS was in a unit mass resolution (UMR) in the measurement launched in Utrecht, Sonnblick, and  
70 Boulder, and was in a high resolution in the measurement launched in Wisconsin and Las Vegas.  
71 <sup>b</sup> NR stands for “not reported”.  
72 <sup>c</sup> NI stands for “no interference”.  
73 <sup>d</sup> UI stands for “unknown interference”.  
74

75 **Table S2.** PTR signals of 63 ions that were detected in RT-PTR measurements but not detected in either  
 76 channel of GC PTR system.

| m/z                                                                                                                                                                                                                 | molecular<br>formula                                       | Note                                                      |
|---------------------------------------------------------------------------------------------------------------------------------------------------------------------------------------------------------------------|------------------------------------------------------------|-----------------------------------------------------------|
| 19.0178                                                                                                                                                                                                             | H <sub>3</sub> O <sup>+</sup>                              | reagent ion                                               |
| 29.9974                                                                                                                                                                                                             | NO <sup>+</sup>                                            | reagent ion                                               |
| 31.9893                                                                                                                                                                                                             | O <sub>2</sub> <sup>+</sup>                                | reagent ion                                               |
| 37.0284                                                                                                                                                                                                             | H <sub>5</sub> O <sub>2</sub> <sup>+</sup>                 | reagent ion                                               |
| 45.9924                                                                                                                                                                                                             | NO <sub>2</sub> <sup>+</sup>                               | PANs related                                              |
| 55.0390                                                                                                                                                                                                             | H <sub>7</sub> O <sub>3</sub> <sup>+</sup>                 | reagent ion                                               |
| 73.0284                                                                                                                                                                                                             | C <sub>3</sub> H <sub>5</sub> O <sub>2</sub> <sup>+</sup>  | C <sub>x</sub> H <sub>y</sub> O <sub>z</sub> <sup>+</sup> |
| 73.0495                                                                                                                                                                                                             | H <sub>9</sub> O <sub>4</sub> <sup>+</sup>                 | reagent ion                                               |
| 83.0128                                                                                                                                                                                                             | C <sub>4</sub> H <sub>3</sub> O <sub>2</sub> <sup>+</sup>  | C <sub>x</sub> H <sub>y</sub> O <sub>z</sub> <sup>+</sup> |
| 84.0444                                                                                                                                                                                                             | C <sub>4</sub> H <sub>6</sub> NO <sup>+</sup>              | /                                                         |
| 85.0284                                                                                                                                                                                                             | C <sub>4</sub> H <sub>5</sub> O <sub>2</sub> <sup>+</sup>  | C <sub>x</sub> H <sub>y</sub> O <sub>z</sub> <sup>+</sup> |
| 87.0077                                                                                                                                                                                                             | C <sub>3</sub> H <sub>3</sub> O <sub>3</sub> <sup>+</sup>  | C <sub>x</sub> H <sub>y</sub> O <sub>z</sub> <sup>+</sup> |
| The protonated molecular ions<br>(C <sub>5</sub> H <sub>13</sub> O <sup>+</sup> ) of the precursors (C <sub>5</sub> H <sub>12</sub> O<br>alcohols) may completely go through<br>fragmentation in the PTR detection. |                                                            |                                                           |
| 89.0961                                                                                                                                                                                                             | C <sub>5</sub> H <sub>13</sub> O <sup>+</sup>              |                                                           |
| 99.0441                                                                                                                                                                                                             | C <sub>5</sub> H <sub>7</sub> O <sub>2</sub> <sup>+</sup>  | C <sub>x</sub> H <sub>y</sub> O <sub>z</sub> <sup>+</sup> |
| 101.0233                                                                                                                                                                                                            | C <sub>4</sub> H <sub>5</sub> O <sub>3</sub> <sup>+</sup>  | C <sub>x</sub> H <sub>y</sub> O <sub>z</sub> <sup>+</sup> |
| 105.0182                                                                                                                                                                                                            | C <sub>3</sub> H <sub>5</sub> O <sub>4</sub> <sup>+</sup>  | C <sub>x</sub> H <sub>y</sub> O <sub>z</sub> <sup>+</sup> |
| 109.0284                                                                                                                                                                                                            | C <sub>6</sub> H <sub>5</sub> O <sub>2</sub> <sup>+</sup>  | C <sub>x</sub> H <sub>y</sub> O <sub>z</sub> <sup>+</sup> |
| 117.0546                                                                                                                                                                                                            | C <sub>5</sub> H <sub>9</sub> O <sub>3</sub> <sup>+</sup>  | C <sub>x</sub> H <sub>y</sub> O <sub>z</sub> <sup>+</sup> |
| 119.0339                                                                                                                                                                                                            | C <sub>4</sub> H <sub>7</sub> O <sub>4</sub> <sup>+</sup>  | C <sub>x</sub> H <sub>y</sub> O <sub>z</sub> <sup>+</sup> |
| 125.0233                                                                                                                                                                                                            | C <sub>6</sub> H <sub>5</sub> O <sub>3</sub> <sup>+</sup>  | C <sub>x</sub> H <sub>y</sub> O <sub>z</sub> <sup>+</sup> |
| 127.0390                                                                                                                                                                                                            | C <sub>6</sub> H <sub>7</sub> O <sub>3</sub> <sup>+</sup>  | C <sub>x</sub> H <sub>y</sub> O <sub>z</sub> <sup>+</sup> |
| 133.0495                                                                                                                                                                                                            | C <sub>5</sub> H <sub>9</sub> O <sub>4</sub> <sup>+</sup>  | C <sub>x</sub> H <sub>y</sub> O <sub>z</sub> <sup>+</sup> |
| 135.0441                                                                                                                                                                                                            | C <sub>8</sub> H <sub>7</sub> O <sub>2</sub> <sup>+</sup>  | C <sub>x</sub> H <sub>y</sub> O <sub>z</sub> <sup>+</sup> |
| 139.0390                                                                                                                                                                                                            | C <sub>7</sub> H <sub>7</sub> O <sub>3</sub>               | C <sub>x</sub> H <sub>y</sub> O <sub>z</sub> <sup>+</sup> |
| 141.0182                                                                                                                                                                                                            | C <sub>6</sub> H <sub>5</sub> O <sub>4</sub> <sup>+</sup>  | C <sub>x</sub> H <sub>y</sub> O <sub>z</sub> <sup>+</sup> |
| 141.1638                                                                                                                                                                                                            | C <sub>10</sub> H <sub>21</sub> <sup>+</sup>               | C <sub>x</sub> H <sub>y</sub> <sup>+</sup>                |
| 145.0495                                                                                                                                                                                                            | C <sub>6</sub> H <sub>9</sub> O <sub>4</sub> <sup>+</sup>  | C <sub>x</sub> H <sub>y</sub> O <sub>z</sub> <sup>+</sup> |
| 145.0859                                                                                                                                                                                                            | C <sub>7</sub> H <sub>13</sub> O <sub>3</sub> <sup>+</sup> | C <sub>x</sub> H <sub>y</sub> O <sub>z</sub> <sup>+</sup> |
| 145.1012                                                                                                                                                                                                            | C <sub>11</sub> H <sub>13</sub> <sup>+</sup>               | C <sub>x</sub> H <sub>y</sub> <sup>+</sup>                |
| 147.0288                                                                                                                                                                                                            | C <sub>5</sub> H <sub>7</sub> O <sub>5</sub> <sup>+</sup>  | C <sub>x</sub> H <sub>y</sub> O <sub>z</sub> <sup>+</sup> |
| 147.0652                                                                                                                                                                                                            | C <sub>6</sub> H <sub>11</sub> O <sub>4</sub> <sup>+</sup> | C <sub>x</sub> H <sub>y</sub> O <sub>z</sub> <sup>+</sup> |
| 147.1016                                                                                                                                                                                                            | C <sub>7</sub> H <sub>15</sub> O <sub>3</sub> <sup>+</sup> | C <sub>x</sub> H <sub>y</sub> O <sub>z</sub> <sup>+</sup> |
| 151.0237                                                                                                                                                                                                            | C <sub>4</sub> H <sub>7</sub> O <sub>6</sub> <sup>+</sup>  | C <sub>x</sub> H <sub>y</sub> O <sub>z</sub> <sup>+</sup> |
| 151.0390                                                                                                                                                                                                            | C <sub>8</sub> H <sub>7</sub> O <sub>3</sub> <sup>+</sup>  | C <sub>x</sub> H <sub>y</sub> O <sub>z</sub> <sup>+</sup> |
| 151.0754                                                                                                                                                                                                            | C <sub>9</sub> H <sub>11</sub> O <sub>2</sub> <sup>+</sup> | C <sub>x</sub> H <sub>y</sub> O <sub>z</sub> <sup>+</sup> |
| 151.1481                                                                                                                                                                                                            | C <sub>11</sub> H <sub>19</sub> <sup>+</sup>               | C <sub>x</sub> H <sub>y</sub> <sup>+</sup>                |
| 153.0546                                                                                                                                                                                                            | C <sub>8</sub> H <sub>9</sub> O <sub>3</sub> <sup>+</sup>  | C <sub>x</sub> H <sub>y</sub> O <sub>z</sub> <sup>+</sup> |



|          |                     |               |
|----------|---------------------|---------------|
| 155.0339 | $C_7H_7O_4^+$       | $C_xH_yO_z^+$ |
| 155.0703 | $C_8H_{11}O_3^+$    | $C_xH_yO_z^+$ |
| 155.1067 | $C_9H_{15}O_2^+$    | $C_xH_yO_z^+$ |
| 157.0132 | $C_6H_5O_5^+$       | $C_xH_yO_z^+$ |
| 157.0859 | $C_8H_{13}O_3^+$    | $C_xH_yO_z^+$ |
| 159.0652 | $C_7H_{11}O_4^+$    | $C_xH_yO_z^+$ |
| 159.1016 | $C_8H_{15}O_3^+$    | $C_xH_yO_z^+$ |
| 161.0445 | $C_6H_9O_5^+$       | $C_xH_yO_z^+$ |
| 161.1172 | $C_8H_{17}O_3^+$    | $C_xH_yO_z^+$ |
| 165.0546 | $C_9H_9O_3^+$       | $C_xH_yO_z^+$ |
| 167.0339 | $C_8H_7O_4^+$       | $C_xH_yO_z^+$ |
| 167.0703 | $C_9H_{11}O_3^+$    | $C_xH_yO_z^+$ |
| 167.1067 | $C_{10}H_{15}O_2^+$ | $C_xH_yO_z^+$ |
| 167.1430 | $C_{11}H_{19}O^+$   | $C_xH_yO_z^+$ |
| 167.1794 | $C_{12}H_{23}^+$    | $C_xH_y^+$    |
| 169.0859 | $C_9H_{13}O_3^+$    | $C_xH_yO_z^+$ |
| 169.1223 | $C_{10}H_{17}O_2^+$ | $C_xH_yO_z^+$ |
| 173.1172 | $C_9H_{17}O_3^+$    | $C_xH_yO_z^+$ |
| 175.1329 | $C_9H_{19}O_3^+$    | $C_xH_yO_z^+$ |
| 175.1481 | $C_{13}H_{19}^+$    | $C_xH_y^+$    |
| 177.1638 | $C_{13}H_{21}^+$    | $C_xH_y^+$    |
| 183.2107 | $C_{13}H_{27}^+$    | $C_xH_y^+$    |
| 189.1121 | $C_9H_{17}O_4^+$    | $C_xH_yO_z^+$ |
| 189.1274 | $C_{13}H_{17}O^+$   | $C_xH_yO_z^+$ |
| 195.1227 | $C_8H_{19}O_5^+$    | $C_xH_yO_z^+$ |
| 209.1384 | $C_9H_{21}O_5^+$    | $C_xH_yO_z^+$ |

---

78 **Table S3.** PTR signals of 22 ions whose campaign-average relative differences between RT-PTR and  
79 GC-PTR were larger than 10% in both GC channels.

| m/z      | molecular<br>formula                                        | Note                                                      |
|----------|-------------------------------------------------------------|-----------------------------------------------------------|
| 41.0386  | C <sub>3</sub> H <sub>5</sub> <sup>+</sup>                  | C <sub>x</sub> H <sub>y</sub> <sup>+</sup>                |
| 62.9632  | CClO <sup>+</sup>                                           | /                                                         |
| 69.0699  | C <sub>5</sub> H <sub>9</sub> <sup>+</sup>                  | C <sub>x</sub> H <sub>y</sub> <sup>+</sup>                |
| 71.0855  | C <sub>5</sub> H <sub>11</sub> <sup>+</sup>                 | C <sub>x</sub> H <sub>y</sub> <sup>+</sup>                |
| 77.0233  | C <sub>2</sub> H <sub>5</sub> O <sub>3</sub> <sup>+</sup>   | C <sub>x</sub> H <sub>y</sub> O <sub>z</sub> <sup>+</sup> |
| 83.0491  | C <sub>5</sub> H <sub>7</sub> O <sup>+</sup>                | C <sub>x</sub> H <sub>y</sub> O <sub>z</sub> <sup>+</sup> |
| 99.0077  | C <sub>4</sub> H <sub>3</sub> O <sub>3</sub> <sup>+</sup>   | C <sub>x</sub> H <sub>y</sub> O <sub>z</sub> <sup>+</sup> |
| 101.0597 | C <sub>5</sub> H <sub>9</sub> O <sub>2</sub> <sup>+</sup>   | C <sub>x</sub> H <sub>y</sub> O <sub>z</sub> <sup>+</sup> |
| 116.9060 | CCl <sub>3</sub> <sup>+</sup>                               | /                                                         |
| 117.0182 | C <sub>4</sub> H <sub>5</sub> O <sub>4</sub> <sup>+</sup>   | C <sub>x</sub> H <sub>y</sub> O <sub>z</sub> <sup>+</sup> |
| 119.0703 | C <sub>5</sub> H <sub>11</sub> O <sub>3</sub> <sup>+</sup>  | C <sub>x</sub> H <sub>y</sub> O <sub>z</sub> <sup>+</sup> |
| 123.0441 | C <sub>7</sub> H <sub>7</sub> O <sub>2</sub> <sup>+</sup>   | C <sub>x</sub> H <sub>y</sub> O <sub>z</sub> <sup>+</sup> |
| 123.0652 | C <sub>4</sub> H <sub>11</sub> O <sub>4</sub> <sup>+</sup>  | C <sub>x</sub> H <sub>y</sub> O <sub>z</sub> <sup>+</sup> |
| 135.1016 | C <sub>6</sub> H <sub>15</sub> O <sub>3</sub> <sup>+</sup>  | C <sub>x</sub> H <sub>y</sub> O <sub>z</sub> <sup>+</sup> |
| 141.0546 | C <sub>7</sub> H <sub>9</sub> O <sub>3</sub> <sup>+</sup>   | C <sub>x</sub> H <sub>y</sub> O <sub>z</sub> <sup>+</sup> |
| 141.0910 | C <sub>8</sub> H <sub>13</sub> O <sub>2</sub> <sup>+</sup>  | C <sub>x</sub> H <sub>y</sub> O <sub>z</sub> <sup>+</sup> |
| 143.0855 | C <sub>11</sub> H <sub>11</sub> <sup>+</sup>                | C <sub>x</sub> H <sub>y</sub> <sup>+</sup>                |
| 153.0910 | C <sub>9</sub> H <sub>13</sub> O <sub>2</sub> <sup>+</sup>  | C <sub>x</sub> H <sub>y</sub> O <sub>z</sub> <sup>+</sup> |
| 153.1274 | C <sub>10</sub> H <sub>17</sub> O <sup>+</sup>              | C <sub>x</sub> H <sub>y</sub> O <sub>z</sub> <sup>+</sup> |
| 167.0550 | C <sub>5</sub> H <sub>11</sub> O <sub>6</sub> <sup>+</sup>  | C <sub>x</sub> H <sub>y</sub> O <sub>z</sub> <sup>+</sup> |
| 171.1380 | C <sub>10</sub> H <sub>19</sub> O <sub>2</sub> <sup>+</sup> | C <sub>x</sub> H <sub>y</sub> O <sub>z</sub> <sup>+</sup> |
| 173.0808 | C <sub>8</sub> H <sub>13</sub> O <sub>4</sub> <sup>+</sup>  | C <sub>x</sub> H <sub>y</sub> O <sub>z</sub> <sup>+</sup> |

81 **Table S4** Species identification derived by the comparison between standard EI mass spectra and measured EI mass spectra, and between theoretical and measured retention  
82 times of GC elutes sampled from 16:56:46 to 17:05:07 on 19 February 2022. The theoretical retention time is calculated based on the Kovat's number <sup>[47]</sup>.

|                                                             | Channel 1 |                       |                                          |                                      |                                   | Channel 2 |                       |                                          |                                      |                                   |
|-------------------------------------------------------------|-----------|-----------------------|------------------------------------------|--------------------------------------|-----------------------------------|-----------|-----------------------|------------------------------------------|--------------------------------------|-----------------------------------|
|                                                             | No.       | Identification        | Match to<br>standard EI<br>mass spectrum | Theoretical<br>retention<br>time (s) | Measured<br>retention<br>time (s) | No.       | Identification        | Match to<br>standard EI<br>mass spectrum | Theoretical<br>retention<br>time (s) | Measured<br>retention<br>time (s) |
| 59.05491 Th<br>C <sub>3</sub> H <sub>7</sub> O <sup>+</sup> | a1        | acetone               | 99%                                      | /                                    | 45                                | a2        | acetone               | 99%                                      | 32                                   | 31                                |
| 107.0855 Th<br>C <sub>8</sub> H <sub>11</sub> <sup>+</sup>  | b1        | ethylbenzene          | 98%                                      | 299                                  | 301                               | b4        | ethylbenzene          | 97%                                      | 226                                  | 225                               |
|                                                             | b2        | m-xylene              | 95%                                      | 305                                  | 307                               | b5        | p-xylene              | 95%                                      | /                                    | 230                               |
|                                                             |           | and p-xylene          | 96%                                      | 306                                  |                                   | b6        | m-xylene              | 97%                                      | 233                                  | 233                               |
|                                                             | b3        | o-xylene              | 97%                                      | 327                                  | 328                               | b7        | o-xylene              | 98%                                      | 259                                  | 259                               |
| 79.0542 Th<br>C <sub>6</sub> H <sub>7</sub> <sup>+</sup>    | c1        | benzene               | 99%                                      | 158                                  | 161                               | c8        | benzene               | 99%                                      | 126                                  | 127                               |
|                                                             | c2        | ethylbenzene          | 98%                                      | 299                                  | 301                               | c9        | ethylbenzene          | 97%                                      | 226                                  | 225                               |
|                                                             | c3        | p-xylene              | 95%                                      | 305                                  | 307                               | c10       | p-xylene              | 97%                                      | /                                    | 230                               |
|                                                             |           | and m-xylene          | 96%                                      | 306                                  |                                   |           | and m-xylene          | 95%                                      | 233                                  | 233                               |
|                                                             | c4        | o-xylene              | 97%                                      | 327                                  | 328                               | c11       | isopropyl-<br>benzene | 94%                                      | /                                    | 248                               |
|                                                             | c5        | isopropyl-<br>benzene | 95%                                      | 344                                  | 345                               | c12       | o-xylene              | 98%                                      | 259                                  | 259                               |
|                                                             | c6        | n-propyl-benzene      | 96%                                      | 367                                  | 367                               | c13       | n-propyl-benzene      | 95%                                      | 270                                  | 270                               |
|                                                             | c7        | benzaldehyde          | 95%                                      | 403                                  | 402                               | c14       | benzaldehyde          | 98%                                      | 458                                  | 456                               |
|                                                             | d1        | isoprene              | 96%                                      | /                                    | 19                                | d3        | octanal               | 95%                                      | 316                                  | 316                               |
|                                                             | d2        | octanal               | 98%                                      | 404                                  | 405                               | d4        | nonanal               | 96%                                      | 377                                  | 375                               |
| 69.0699 Th<br>C <sub>5</sub> H <sub>9</sub> <sup>+</sup>    |           |                       |                                          |                                      |                                   | d5        | decanal               | 95%                                      | 425                                  | 422                               |

83

84 **References**

- 85 Coggon, M. M., Stockwell, C. E., Claflin, M. S., Pfannerstill, E. Y., Xu, L., Gilman, J. B., Marcantonio, J., Cao, C., Bates, K., Gkatzelis, G. I., Lamplugh, A., Katz, E. F.,  
86 Arata, C., Apel, E. C., Hornbrook, R. S., Piel, F., Majluf, F., Blake, D. R., Wisthaler, A., Canagaratna, M., Lerner, B. M., Goldstein, A. H., Mak, J. E., and Warneke, C.:  
87 Identifying and correcting interferences to PTR-ToF-MS measurements of isoprene and other urban volatile organic compounds, *Atmos. Meas. Tech.*, 17, 801–825,  
88 <https://doi.org/10.5194/amt-17-801-2024>, 2024.
- 89 Gouw, J. de, Warneke, C., Karl, T., Eerdekens, G., Veen, C. van der, and Fall, R.: Sensitivity and specificity of atmospheric trace gas detection by proton-transfer-reaction  
90 mass spectrometry, *Int. J. Mass Spectrom.*, 223, 365–382, [https://doi.org/10.1016/s1387-3806\(02\)00926-0](https://doi.org/10.1016/s1387-3806(02)00926-0), 2003.
- 91 Vermeuel, M. P., Novak, G. A., Kilgour, D. B., Claflin, M. S., Lerner, B. M., Trowbridge, A. M., Thom, J., Cleary, P. A., Desai, A. R., and Bertram, T. H.: Observations of  
92 biogenic volatile organic compounds over a mixed temperate forest during the summer to autumn transition, *Atmos. Chem. Phys.*, 23, 4123–4148,  
93 <https://doi.org/10.5194/acp-23-4123-2023>, 2023.
- 94 Warneke, C., Gouw, J. A. de, Kuster, W. C., Goldan, P. D., and Fall, R.: Validation of Atmospheric VOC Measurements by Proton-Transfer- Reaction Mass Spectrometry  
95 Using a Gas-Chromatographic Preseparation Method, *Environ. Sci. Technol.*, 37, 2494–2501, <https://doi.org/10.1021/es026266i>, 2003.

96
